# Supplementary material
Source: PubMed Central journal article supplement (PMC1913807)
Supplement: plntphys_pp.107.098723_4.pdf [file plntphys_pp.107.098723_4.pdf]

**Table S1** Frequencies of microspores producing embryos with long, normal-looking suspensors in *Brassica napus* microspore cultures as affected by different 24 hour heat-stress temperature regimes and starting bud size classes.

The results shown are from a representative experiment. Smaller increments in the size of the sampled buds were used to obtain more developmentally homogenous material.

| Temperature<br>(°C) | Percentage of microspores producing embryos with normal-looking suspensors in microspore cultures isolated from different bud size classes (mm) |            |            |            |
|---------------------|-------------------------------------------------------------------------------------------------------------------------------------------------|------------|------------|------------|
|                     | 3.1-3.2 mm                                                                                                                                      | 3.2-3.3 mm | 3.3-3.4 mm | 3.4-3.5 mm |
| 27.5                | 0                                                                                                                                               | 0          | 0          | 0          |
| 29.0                | 0.3                                                                                                                                             | 0.1        | 0.1        | 0          |
| 30.5                | 0.2                                                                                                                                             | 0.5        | 0.2        | 0.1        |
| 32.0                | 0                                                                                                                                               | 0.2        | 2.3        | 0.1        |
| 33.5                | 0                                                                                                                                               | 0          | 0          | 0.1        |
