# Supplementary material
Source: PubMed Central journal article supplement (PMC1913807)

**Figure S3** Overview of protein spots chosen for sequencing

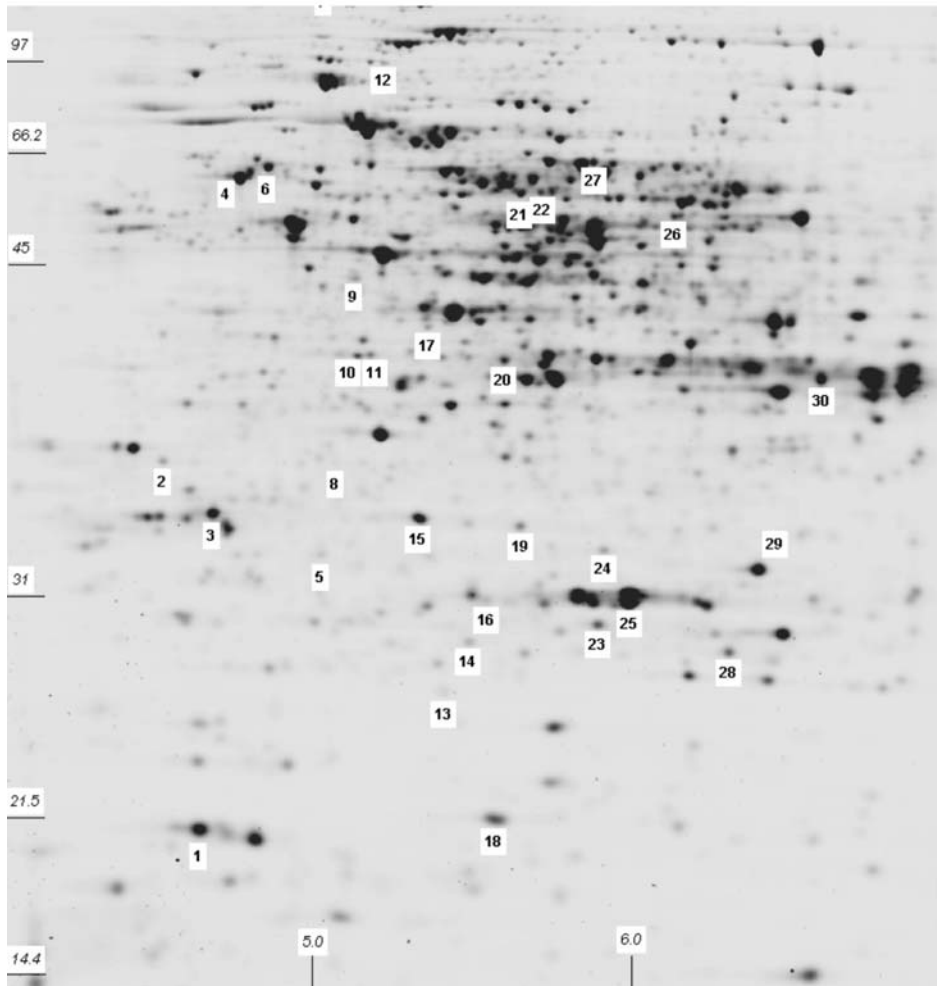

Supplement: plntphys_pp.107.098723_3.pdf [file plntphys_pp.107.098723_3.pdf]
